# Supplementary material for: XX/XY Chimerism in Internal Genitalia of a Virilized Heifer
Source: MDPI journal article supplement (doi:10.3390/ani12212932), 2022-10-26
Supplement: s1 [file s1]

# ***XX/XY chimerism in internal genitalia of a virilized heifer***

by Szczerbal et al.

## **Supplementary material**

Supplementary Table S1. PCR conditions applied in molecular analysis of the selected genes.

| Application | Gene                          | Primers and probe sequences                                                                                                                   | Amplicon length (bp) | Annealing temperature |
|-------------|-------------------------------|-----------------------------------------------------------------------------------------------------------------------------------------------|----------------------|-----------------------|
| PCR         | <i>SRY</i>                    | F: 5' aagaacaacttatgaatagcacca<br>R: 5' ttaagtcgcaggtgaaactgt                                                                                 | 851                  | 58°C                  |
|             | <i>ZFX</i> and <i>ZFY</i>     | F: 5' ataatcacatggagagccaccagct<br>R: 5' gcacttcttggatatctgagaaagt                                                                            | 448                  | 58°C                  |
| ddPCR       | <i>AMELX</i> and <i>AMELY</i> | F: 5' ccagccacctgtgc<br>R: 5' ggctgcatggggaata<br><i>AMELX</i> _probe: 5' cagcgcttgccacc (FAM)<br><i>AMELY</i> _probe: 5' cagcccttgccgc (HEX) | 72                   | 55°C                  |
|             | <i>SOX9</i> (exon 3)          | BIO-RAD Assay ID: dCNS719223989                                                                                                               |                      | 57°C                  |
|             | <i>F2</i> (reference gene)    | F: 5' cctgtctgctgagacgccg<br>R: 5' gtggtagagttgattctggaatagaaagcat<br>probe 5' HEX-ccccgccaccgcagtgctct                                       | 96                   | 57°C                  |

Supplementary Table S2. STR markers analyzed in DSD heifer #7514.

| Marker  | Alleles identified in different tissues |         |             |             |             |             |
|---------|-----------------------------------------|---------|-------------|-------------|-------------|-------------|
|         | blood                                   | hair    | ovary 1     | ovary 2     | uterus      | oviduct     |
| BM1818  | 266/268                                 | 266/268 | 266/268     | 266/268     | 266/268     | 266/268     |
| BM1824  | 188/188                                 | 188/188 | 188/188     | 188/188     | 188/188     | 188/188     |
| BM2113  | 127/135                                 | 127/135 | 127/135     | 127/135     | 127/135     | 127/135     |
| ETH3    | 125/129                                 | 125/129 | 117/125/129 | 117/125/129 | 117/125/129 | 117/125/129 |
| ETH10   | 219/223                                 | 219/223 | 217/219/223 | 217/219/223 | 217/219/223 | 217/219/223 |
| ETH225  | 140/148                                 | 140/148 | 140/146/148 | 140/146/148 | 140/146/148 | 140/146/148 |
| INRA23  | 206/208                                 | 206/208 | 206/208     | 206/208     | 206/208     | 206/208     |
| SPS115  | 248/248                                 | 248/248 | 248/256     | 248/256     | 248/256     | 248/256     |
| TGLA53  | 160/170                                 | 160/170 | 160/162/170 | 160/162/170 | 160/162/170 | 160/162/170 |
| TGLA122 | 147/149                                 | 147/149 | 147/149     | 147/149     | 147/149     | 147/149     |
| TGLA126 | 115/117                                 | 115/117 | 115/117     | 115/117     | 115/117     | 115/117     |
| TGLA227 | 89/103                                  | 89/103  | 83/89/103   | 83/89/103   | 83/89/103   | 83/89/103   |

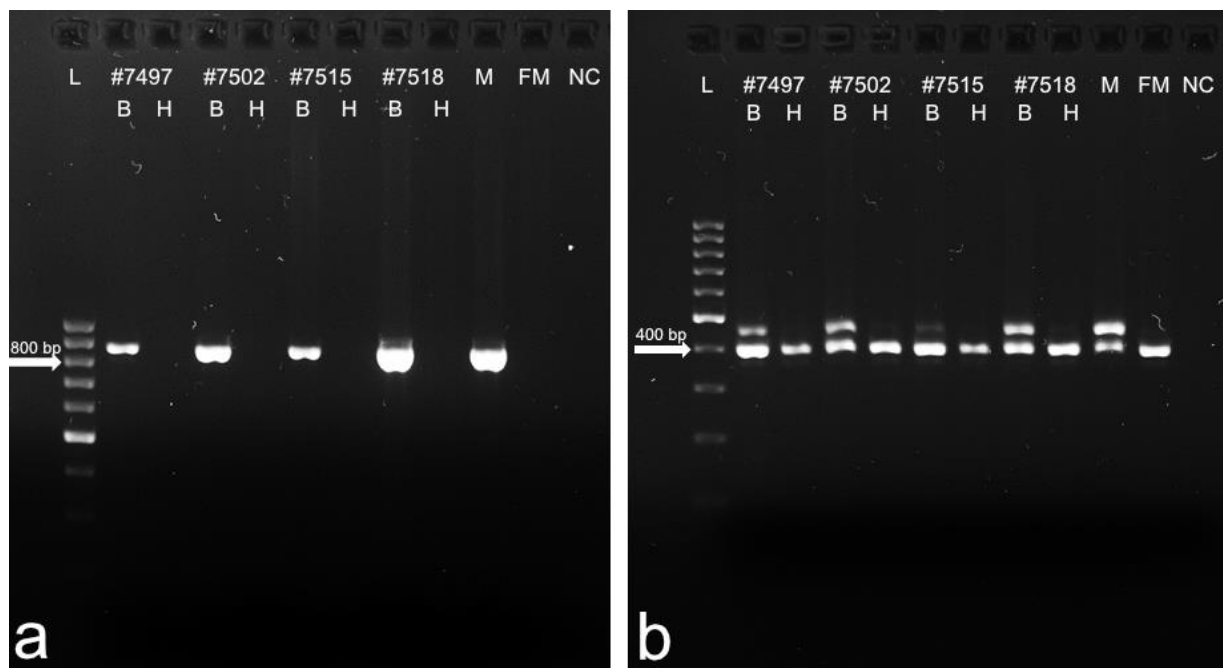

Supplementary Figure S1. Detection of *SRY* (a) and *ZFY* (b) genes in freemartin cases. L: GeneRuler DNA ladder; B: blood; H: hair follicles; M: control male; FM: control female; NC: negative control (no DNA).

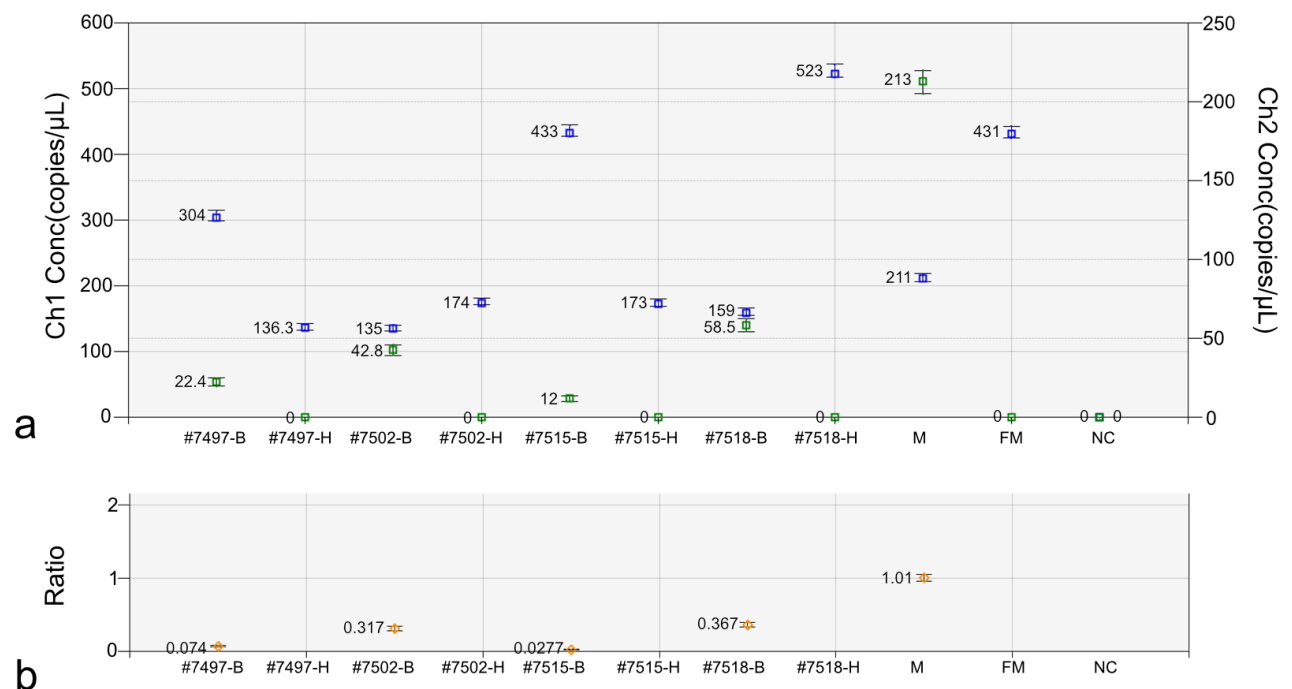

Supplementary Figure S2. Estimation of the Y/X ratio by ddPCR based on the proportion of *AMELY* and *AMELX* amplicons in freemartin cases. (a) amplification signals from chromosome X (blue color) and Y (green color). (b) Y/X ratio is presented. B: blood; H: hair follicles; M: control male; FM: control female; NC: negative control (no DNA).

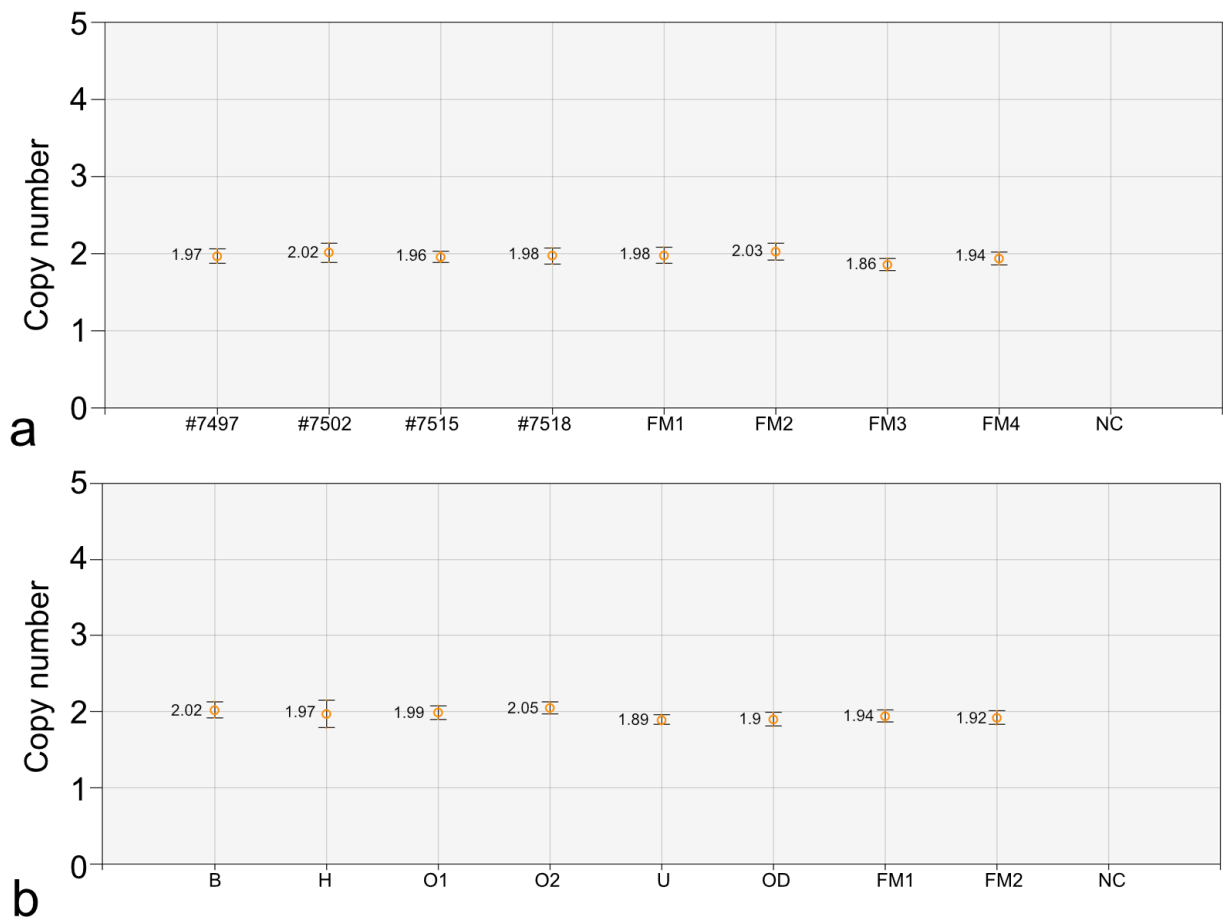

Supplementary Figure S3. Estimation of *SOX9* copy number by ddPCR for freemartin cases (a) and DSD heifer #7514 (b). B: blood; H: hair follicles; O1: ovary 1; O2: ovary 2; U: uterus; OD: oviduct; FM: control female; NC: negative control (no DNA).

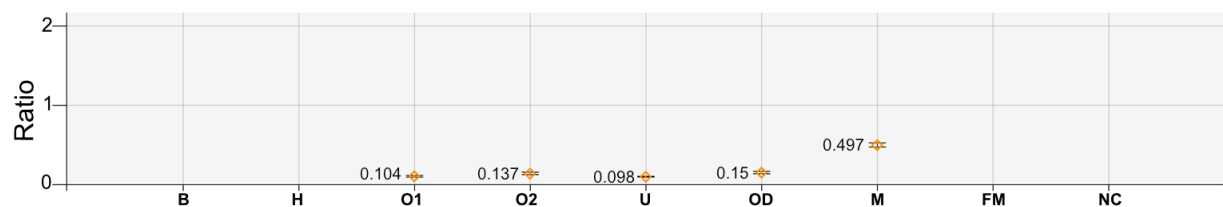

Supplementary Figure S4. Estimation of the Y/autosome ratio by ddPCR based on the proportion of *AMELY* and *SOX9* amplicons in the DSD heifer #7514. B: blood; H: hair follicles; O1: ovary 1; O2: ovary 2; U: uterus; OD: oviduct; M: control male; FM: control female; NC: negative control (no DNA).
